# Supplementary material for: Genome-wide association studies reveal stable loci for wheat grain size under different sowing dates
Source: PeerJ. 2024 Feb 26;12:e16984. doi: 10.7717/peerj.16984 (PMC10903348; doi:10.7717/peerj.16984)
Supplement: Figure S1 — Blue font represents accessions and brown font represents environments. [file peerj-12-16984-s001.pdf]

PC2 (28.9%)

6  
4  
2  
0  
-2  
-4

YC\_stagelll

YC\_stagell

WS249

WS253  
WS183  
WS129  
WS107  
WS106  
WS086  
WS085  
WS084  
WS083  
WS082  
WS081  
WS080  
WS079  
WS078  
WS077  
WS076  
WS075  
WS074  
WS073  
WS072  
WS071  
WS070  
WS069  
WS068  
WS067  
WS066  
WS065  
WS064  
WS063  
WS062  
WS061  
WS060  
WS059  
WS058  
WS057  
WS056  
WS055  
WS054  
WS053  
WS052  
WS051  
WS050  
WS049  
WS048  
WS047  
WS046  
WS045  
WS044  
WS043  
WS042  
WS041  
WS040  
WS039  
WS038  
WS037  
WS036  
WS035  
WS034  
WS033  
WS032  
WS031  
WS030  
WS029  
WS028  
WS027  
WS026  
WS025  
WS024  
WS023  
WS022  
WS021  
WS020  
WS019  
WS018  
WS017  
WS016  
WS015  
WS014  
WS013  
WS012  
WS011  
WS010  
WS009  
WS008  
WS007  
WS006  
WS005  
WS004  
WS003  
WS002  
WS001

WS102  
WS101  
WS100  
WS099  
WS098  
WS097  
WS096  
WS095  
WS094  
WS093  
WS092  
WS091  
WS090  
WS089  
WS088  
WS087  
WS086  
WS085  
WS084  
WS083  
WS082  
WS081  
WS080  
WS079  
WS078  
WS077  
WS076  
WS075  
WS074  
WS073  
WS072  
WS071  
WS070  
WS069  
WS068  
WS067  
WS066  
WS065  
WS064  
WS063  
WS062  
WS061  
WS060  
WS059  
WS058  
WS057  
WS056  
WS055  
WS054  
WS053  
WS052  
WS051  
WS050  
WS049  
WS048  
WS047  
WS046  
WS045  
WS044  
WS043  
WS042  
WS041  
WS040  
WS039  
WS038  
WS037  
WS036  
WS035  
WS034  
WS033  
WS032  
WS031  
WS030  
WS029  
WS028  
WS027  
WS026  
WS025  
WS024  
WS023  
WS022  
WS021  
WS020  
WS019  
WS018  
WS017  
WS016  
WS015  
WS014  
WS013  
WS012  
WS011  
WS010  
WS009  
WS008  
WS007  
WS006  
WS005  
WS004  
WS003  
WS002  
WS001

WS081

YZ\_stagell

YZ\_stagelll

YZ\_stagell

YC\_stagell

-4

-2

0

2

4

6

8

PC1 (32.0%)
