# Supplementary material for: Genome-wide association studies reveal stable loci for wheat grain size under different sowing dates
Source: PeerJ journal article supplement (doi:10.7717/peerj.16984), 2024-02-26

**A**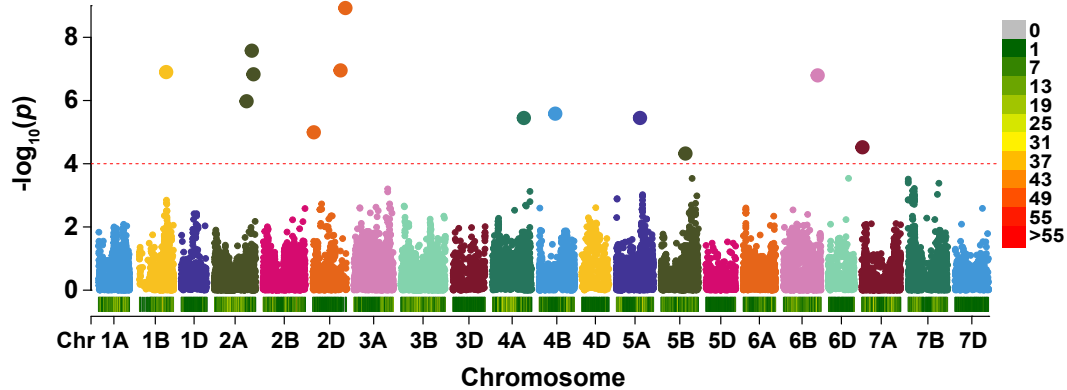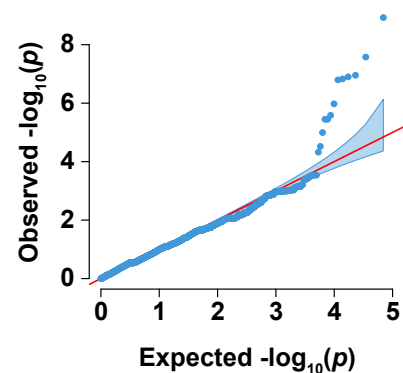**B**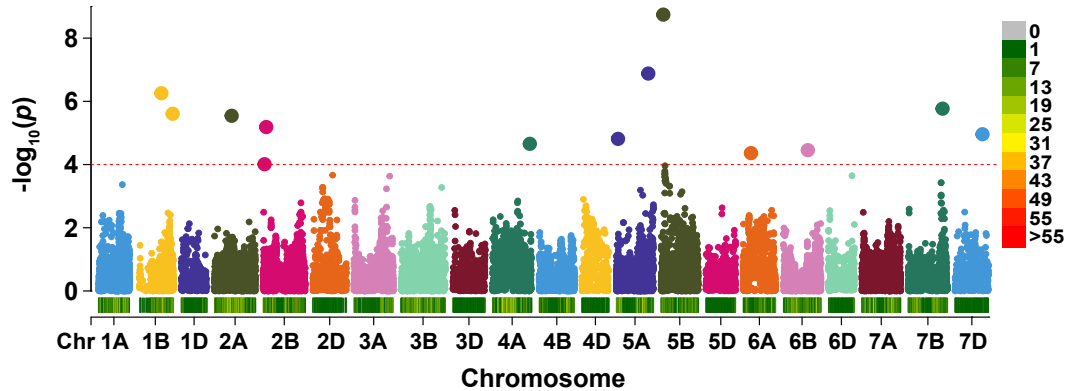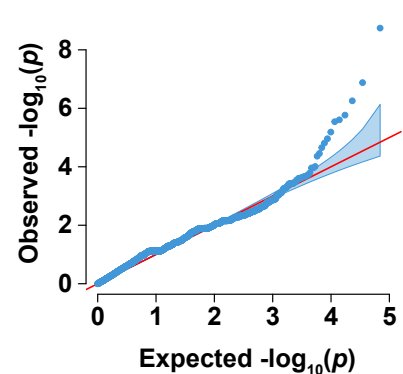**C**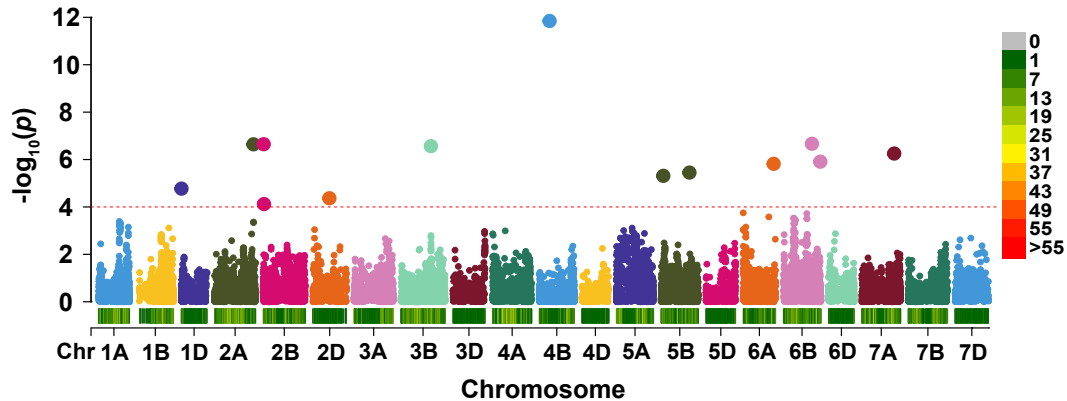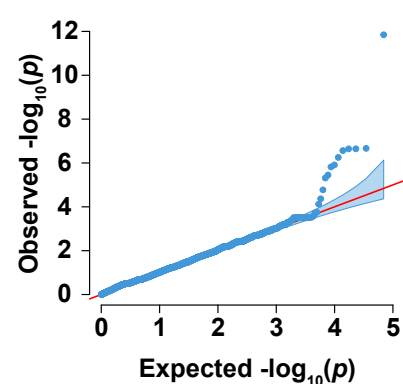

Supplement: Figure_S4.pdf [file Figure_S4.pdf]
